# Supplementary material for: Cadmium hydroxide nanowires – new high capacity Ni–Cd battery anode materials without memory effect
Source: Royal Society of Chemistry journal article supplement (doi:10.1039/c2jm33169a), 2012-01-01

## Supporting Information for Cadmium Hydroxide Nanowires---New Ni-Cd battery Cathode Materials with High Capacity and Stability

Peng Gao,<sup>\*a</sup> Ying Wang,<sup>a</sup> Qin Zhang,<sup>a</sup> Yujin Chen,<sup>\*b</sup> Di Bao,<sup>a</sup> Longqiang Wang,<sup>a</sup> Yuzeng Sun,<sup>c</sup> Guobao Li,<sup>\*c</sup> and Milin Zhang<sup>a</sup>

<sup>a</sup> Key Laboratory of Superlight Materials and Surface Technology, Ministry of Education, Harbin Engineering University, Harbin, Heilongjiang, 150001, P. R. China; E-mail: gaopeng@hrbeu.edu.cn

<sup>b</sup> College of Science, Harbin Engineering University, Harbin, 150001, China; E-mail: chenylujin@hrbeu.edu.cn

<sup>c</sup> Beijing National Laboratory for Molecular Sciences, State Key Laboratory of Rare Earth Materials Chemistry and Applications, Peking University, Beijing 100871, China; E-mail: liguobao@pku.edu.cn

RECEIVED DATE (automatically inserted by publisher); Email: gaopeng@hrbeu.edu.cn

**Figure S1.** XPS patterns of Cd(OH)<sub>2</sub> NWs charged fully performed on a PHI 5700 ESCA System, which confirm the compositions of Cd(OH)<sub>2</sub>, Cd and CdO<sub>2</sub>.

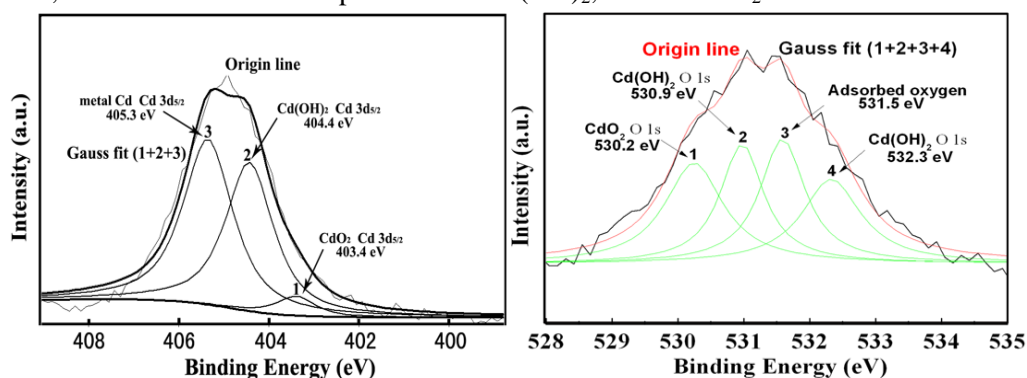

**Figure S2.** Charge-discharge cycle life at a constant current density of 30 mA/g of the as-obtained Cd(OH)<sub>2</sub> materials with different morphologies and sizes.

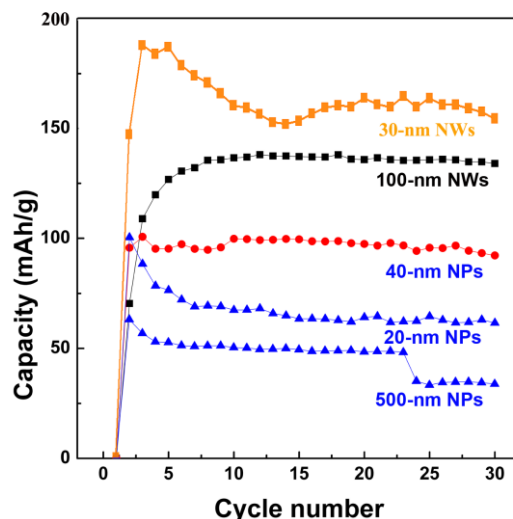

Supplement: c2jm33169a.pdf [file c2jm33169a.pdf]
